# Supplementary material
Source: PubMed Central journal article supplement (PMC2667240)
Supplement: NIHMS81986-supplement-SuppFigLegends.pdf [file NIHMS81986-supplement-SuppFigLegends.pdf]

**Fig. S1.** The effect of Noggin on DA neuronal cell development. ICC for Nestin (green), the neuronal marker Tuj1 (blue), the DA marker TH (red) and Hoechst at DIV21 in the 3-week Noggin conditions. Some TH<sup>+</sup> neurons (arrows) developed already during co-culture with the MS5 stromal cells at the early (rosette (r)) stages of differentiation. Scale bars at 50  $\mu\text{m}$ .

**Fig. S2.** Presence of myocytes, astroglia and radial-glia-like cells at late stages (DIV49) of differentiation. ICC for Nestin, GFAP, and MF20 (**a**) and Nestin, GFAP and 3CB2 (**b**) in the 1-week and 3-weeks Noggin treatment conditions, respectively. Scale bar at 100  $\mu\text{m}$ . GFAP<sup>+</sup> cells also express Nestin and 3CB2 indicating that astroglia are derived from radial-glia-like precursors.
