# Supplementary material
Source: PubMed Central journal article supplement (PMC2667240)

Fig. S1

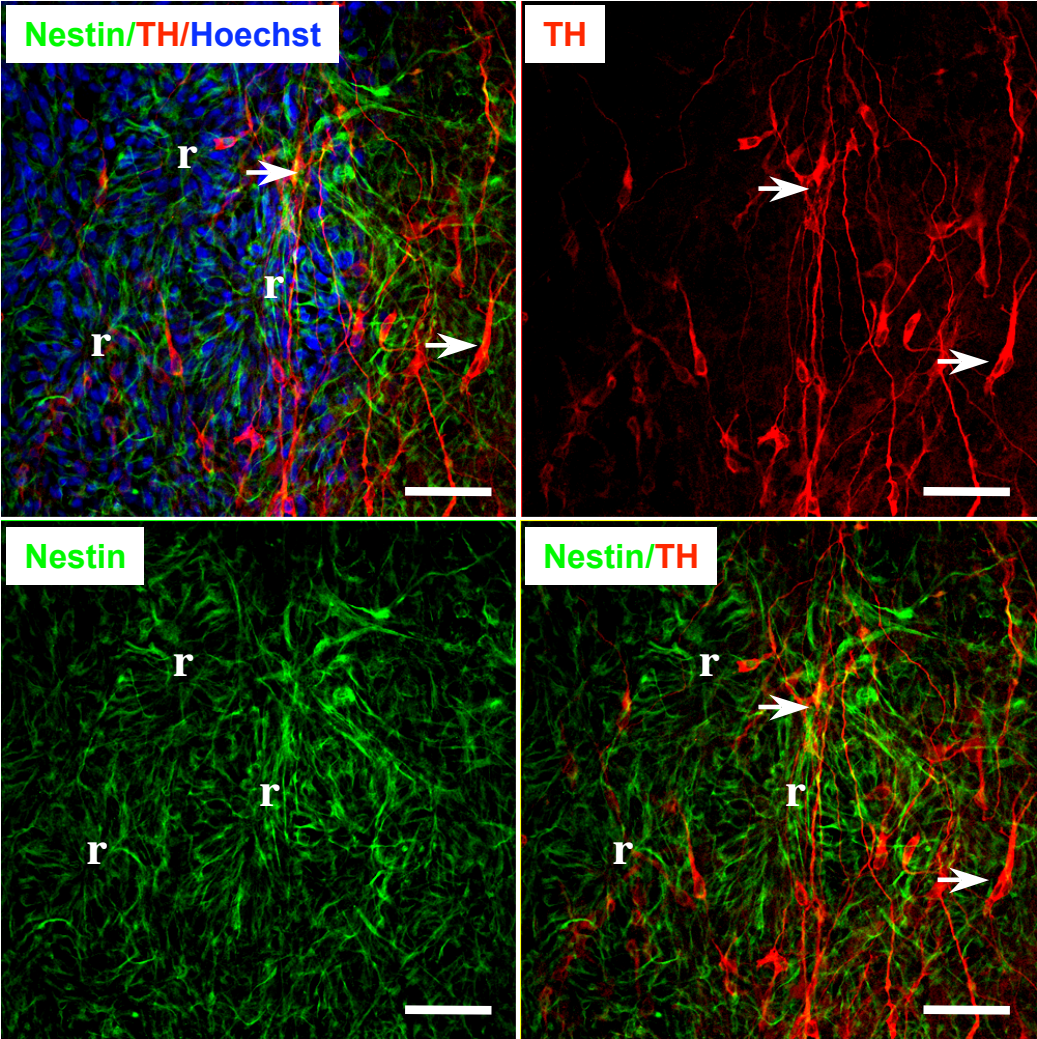

Supplement: NIHMS81986-supplement-SuppFig1.pdf [file NIHMS81986-supplement-SuppFig1.pdf]

Fig. S2

**a**

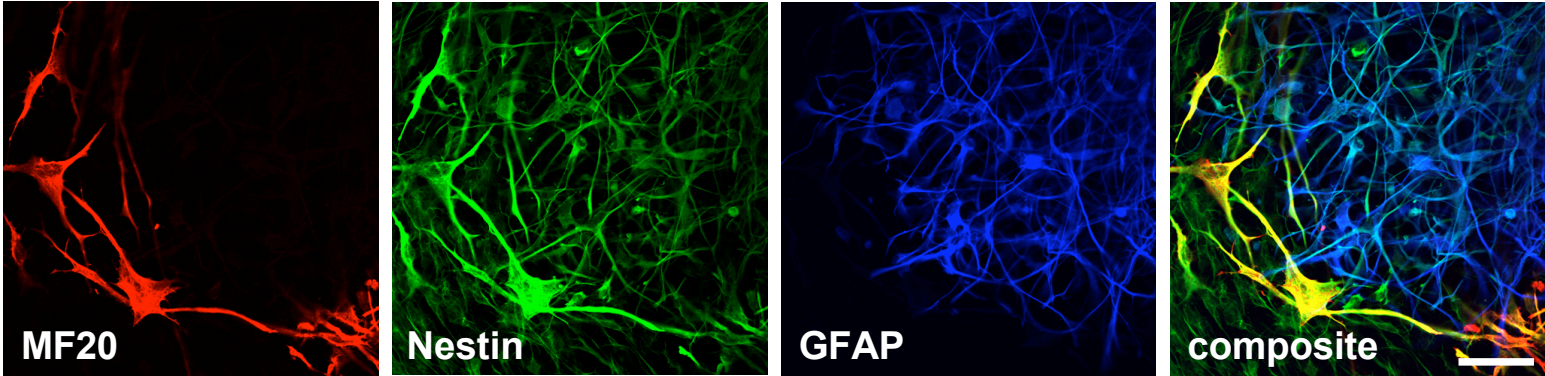

**b**

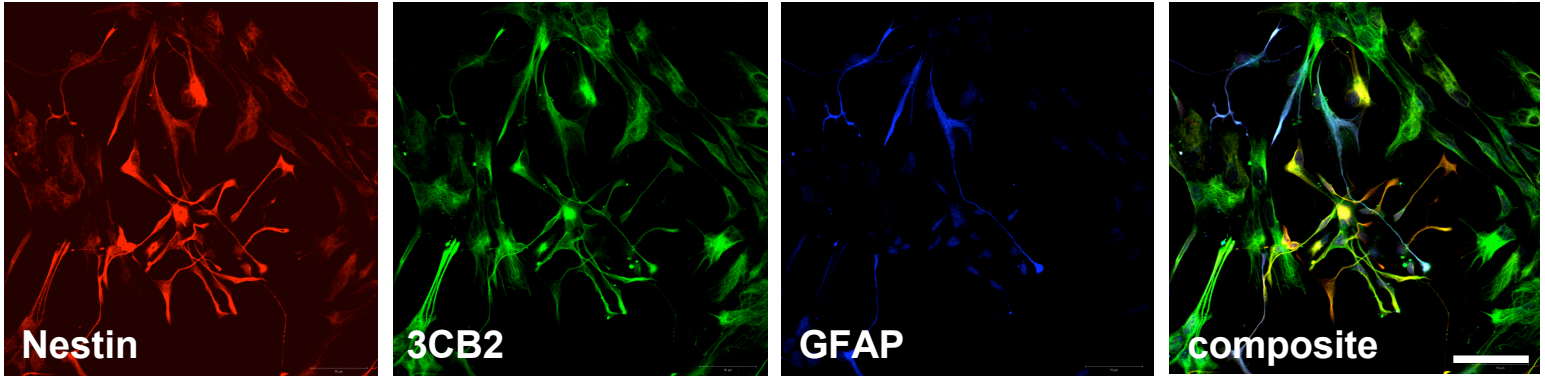

Supplement: NIHMS81986-supplement-SuppFig2.pdf [file NIHMS81986-supplement-SuppFig2.pdf]
